# Supplementary material for: Mitogenomics and the Phylogeny of Mantis Shrimps (Crustacea: Stomatopoda)
Source: MDPI journal article supplement (doi:10.3390/d13120647), 2021-12-05
Supplement: s1 [file s1]

**Table S1.** Fraction of parsimony informative characters out of the total characters for each gene of the nucleotide and amino acid datasets. The three-outgroup analysis was with *Euphausia pacifica*, *Cymothoa indica*, and *Neomysis japonica*.

| <b>Gene</b> | <b><i>Hemisquilla</i><br/>Outgroup<br/>Nucleotide Dataset</b> | <b><i>Hemisquilla</i><br/>Outgroup Amino<br/>Acid/Nucleotide<br/>Dataset</b> | <b>3 Outgroups<br/>Nucleotide<br/>Dataset</b> | <b>3 Outgroups Amino<br/>Acid/Nucleotide<br/>Dataset</b> |
|-------------|---------------------------------------------------------------|------------------------------------------------------------------------------|-----------------------------------------------|----------------------------------------------------------|
| ATP6        | 0.414                                                         | 0.133                                                                        | 0.481                                         | 0.259                                                    |
| ATP8        | 0.516                                                         | 0.442                                                                        | 0.566                                         | 0.509                                                    |
| COX1        | 0.359                                                         | 0.064                                                                        | 0.404                                         | 0.128                                                    |
| COX2        | 0.379                                                         | 0.114                                                                        | 0.455                                         | 0.194                                                    |
| COX3        | 0.383                                                         | 0.129                                                                        | 0.432                                         | 0.185                                                    |
| CYTB        | 0.385                                                         | 0.079                                                                        | 0.451                                         | 0.203                                                    |
| ND1         | 0.423                                                         | 0.140                                                                        | 0.480                                         | 0.244                                                    |
| ND2         | 0.518                                                         | 0.347                                                                        | 0.614                                         | 0.490                                                    |
| ND3         | 0.433                                                         | 0.168                                                                        | 0.504                                         | 0.267                                                    |
| ND4         | 0.439                                                         | 0.195                                                                        | 0.527                                         | 0.326                                                    |
| ND4L        | 0.363                                                         | 0.121                                                                        | 0.467                                         | 0.323                                                    |
| ND5         | 0.444                                                         | 0.200                                                                        | 0.535                                         | 0.315                                                    |
| ND6         | 0.488                                                         | 0.326                                                                        | 0.590                                         | 0.492                                                    |

**Table S2.** Models used for each gene in the datasets for maximum likelihood analyses. The models were chosen by ModelTest-NG. The three-outgroup analysis was with *Euphausia pacifica*, *Cymothoa indica*, and *Neomysis japonica*.

| Genes | <i>Hemisquilla</i><br>Outgroup<br>Nucleotide<br>Only<br>Dataset | <i>Hemisquilla</i><br>Outgroup<br>Amino<br>Acid/Nucleotide<br>Dataset | 3 Outgroups<br>Nucleotide<br>Dataset | 3 Outgroups<br>Amino<br>Acid/Nucleotide<br>Dataset | <i>Euphausia</i><br>Outgroup<br>Amino<br>Acid/Nucleotide<br>Dataset | <i>Neomysis</i><br>Outgroup<br>Amino<br>Acid/Nucleotide<br>Dataset | <i>Cymothoa</i><br>Outgroup<br>Amino<br>Acid/Nucleotide<br>Dataset |
|-------|-----------------------------------------------------------------|-----------------------------------------------------------------------|--------------------------------------|----------------------------------------------------|---------------------------------------------------------------------|--------------------------------------------------------------------|--------------------------------------------------------------------|
| ATP6  | TVM+I+G                                                         | MTMAM                                                                 | TVM+I+G                              | MTMAM                                              | MTMAM                                                               | MTMAM                                                              | MTMAM                                                              |
| ATP8  | TPM3uf+I+G                                                      | MTREV                                                                 | TPM3uf+I+G                           | MTREV                                              | MTREV                                                               | MTREV                                                              | MTREV                                                              |
| COX1  | TN93+I+G                                                        | MTZOA                                                                 | TIM2+I+G                             | MTZOA                                              | MTZOA                                                               | MTZOA                                                              | MTZOA                                                              |
| COX2  | GTR+I+G                                                         | MTZOA                                                                 | TVM+I+G                              | MTZOA                                              | MTZOA                                                               | MTZOA                                                              | MTART                                                              |
| COX3  | TPM2uf+I+G                                                      | MTZOA                                                                 | TVM+I+G                              | MTZOA                                              | MTZOA                                                               | MTZOA                                                              | MTZOA                                                              |
| CYTB  | TPM2uf+I+G                                                      | MTZOA                                                                 | TIM2+I+G                             | MTZOA                                              | MTZOA                                                               | MTZOA                                                              | MTZOA                                                              |
| ND1   | GTR+I+G                                                         | MTZOA                                                                 | GTR+I+G                              | MTART                                              | MTZOA                                                               | MTART                                                              | MTZOA                                                              |
| ND2   | TIM2+I+G                                                        | MTZOA                                                                 | GTR+I+G                              | MTMAM                                              | MTZOA                                                               | MTZOA                                                              | MTMAM                                                              |
| ND3   | TPM2uf+I+G                                                      | MTZOA                                                                 | TIM2+I+G                             | MTMAM                                              | MTMAM                                                               | MTZOA                                                              | MTMAM                                                              |
| ND4   | GTR+I+G                                                         | MTZOA                                                                 | GTR+I+G                              | MTZOA                                              | MTZOA                                                               | MTZOA                                                              | MTZOA                                                              |
| ND4L  | TVM+I+G                                                         | MTZOA                                                                 | TPM3uf+G                             | MTZOA                                              | MTZOA                                                               | MTZOA                                                              | MTZOA                                                              |
| ND5   | GTR+I+G                                                         | MTZOA                                                                 | GTR+I+G                              | MTZOA                                              | MTZOA                                                               | MTZOA                                                              | MTZOA                                                              |
| ND6   | GTR+I+G                                                         | MTMAM                                                                 | GTR+I+G                              | MTREV                                              | MTMAM                                                               | MTREV                                                              | MTREV                                                              |
| 16S   | TIM3+I+G                                                        | TIM3+I+G                                                              | TIM3+I+G                             | TIM3+I+G                                           | TIM3+I+G                                                            | TIM3+I+G                                                           | TIM2+I+G                                                           |
| 12S   | TIM2+I+G                                                        | TIM2+I+G                                                              | TPM2uf+G                             | TPM2uf+G                                           | TIM2+I+G                                                            | TPM2uf+I+G                                                         | TPM2uf+I+G                                                         |
| 18S   | TN93+I+G                                                        | TN93+I+G                                                              | TIM3+I+G                             | TIM3+I+G                                           | TIM3+I+G                                                            | TN93+I+G                                                           | TN93+I+G                                                           |

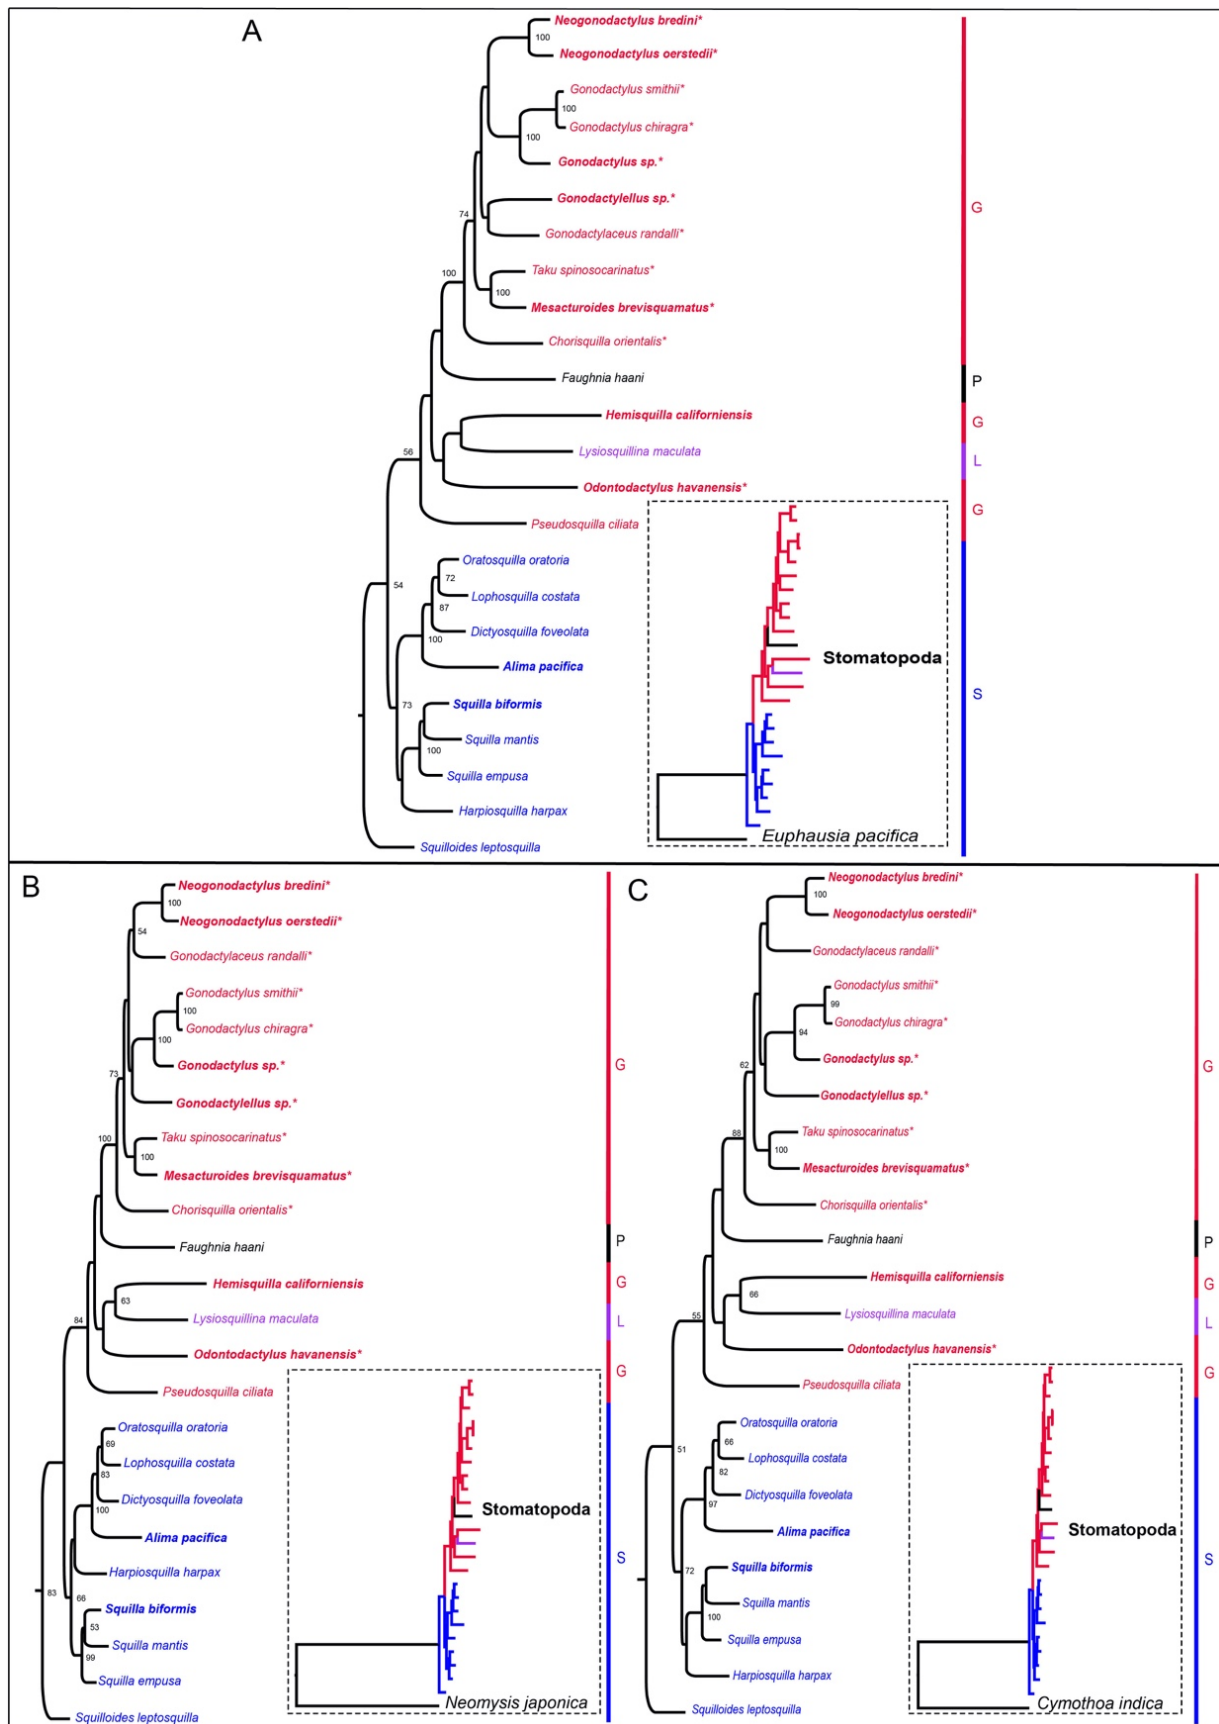

**Figure S1.** Stomatopoda phylogeny based on the concatenated mitochondrial genes and 18S rRNA sequences. Maximum likelihood tree topologies from the mixed amino acid and nucleotide dataset analysed with three different outgroups. Newly sequenced species are in bold. Each superfamily is coded by color of the taxon name. Superfamily abbreviations are G: Gonodactyloidea, L: Lysiosquilloidea, S: Squilloidea, P: Parasquilloidea. Asterisks in the taxon name denote smashers. Values at the nodes represent the bootstrap scores, blank if below 50. (A) *Euphausia pacifica* as outgroup (B) *Neomysis japonica* as outgroup. (C) *Cymothoa indica* as outgroup.
